# Supplementary material for: In Vitro Anti-Inflammatory Activity in Arthritic Synoviocytes of A. brachypoda Root Extracts and Its Unusual Dimeric Flavonoids
Source: MDPI journal article supplement (doi:10.3390/molecules25215219), 2020-11-09
Supplement: s1 [file s1]

## 1. Supplementary Material

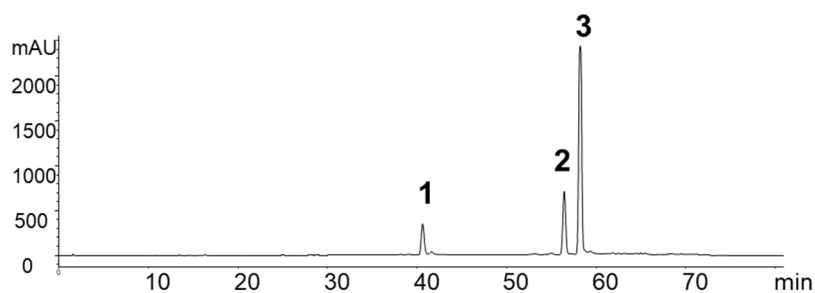

**Figure S1.** Reverse phase HPLC-UV analysis at 254 nm - optimized conditions for MPLC separation. Brachydin A (1), Brachydin B (2) and Brachydin C (3).

$$K_p = \frac{[S]_{\text{upper phase}}}{[S]_{\text{lower phase}}}$$

**Figure S2.** Coefficient of partition  $K_p$  equation (ARIZONA system).

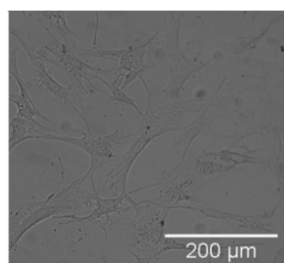

**Figure S3.** Human fibroblast like synoviocytes (optical microscope). Scale bar: 200 μm.

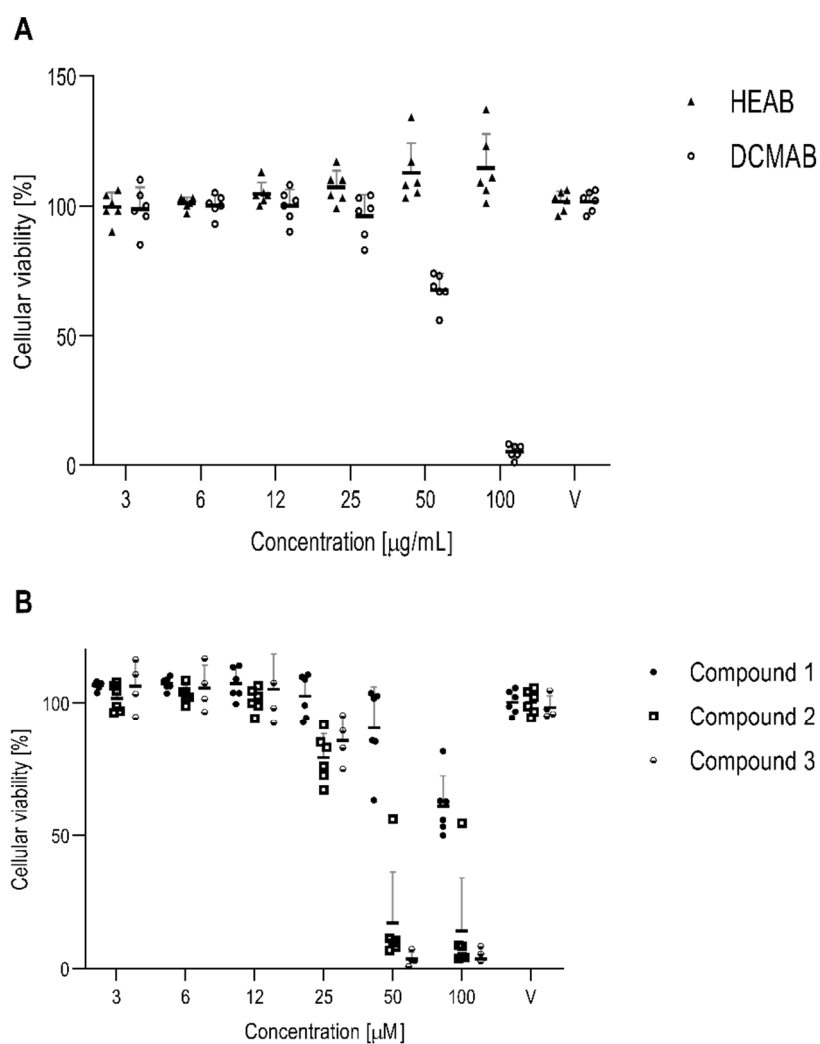

**Figure S4.** Scatter plot of Figure 3, showing cellular viability of human fibroblast like synoviocytes (HFLS) incubated with all tested compounds at increasing concentrations, after 24 h. Root extracts (**A**) and isolated compounds from dichloromethane extract (DCMAB) (**B**). Individual plotted values ( $n = 6$ ) with mean values  $\pm$  S.D.. V = vehicle, 0.01 % dimethyl sulfoxide (DMSO).

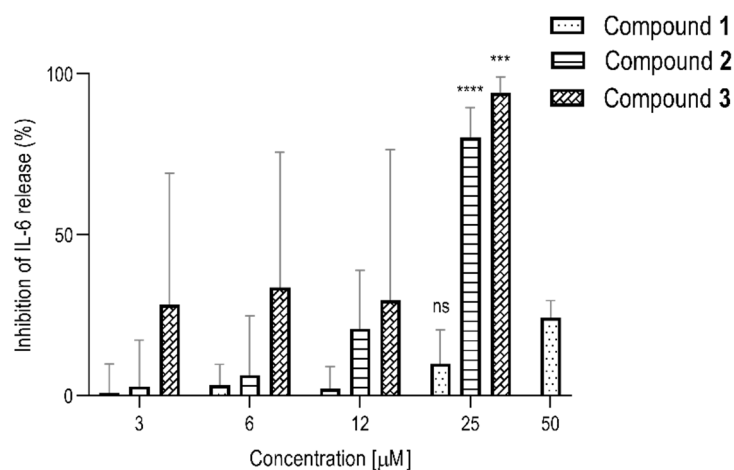

**Figure S5.** Inhibition percentage of IL-6 release normalized to 100 % activation, as a function of each compound concentration. Bars correspond to mean values  $\pm$  S.D.;  $n = 6$ . \*\*\*\*  $p < 0.0001$  and \*\*\*  $p = 0.0007$  and ns = no significance.

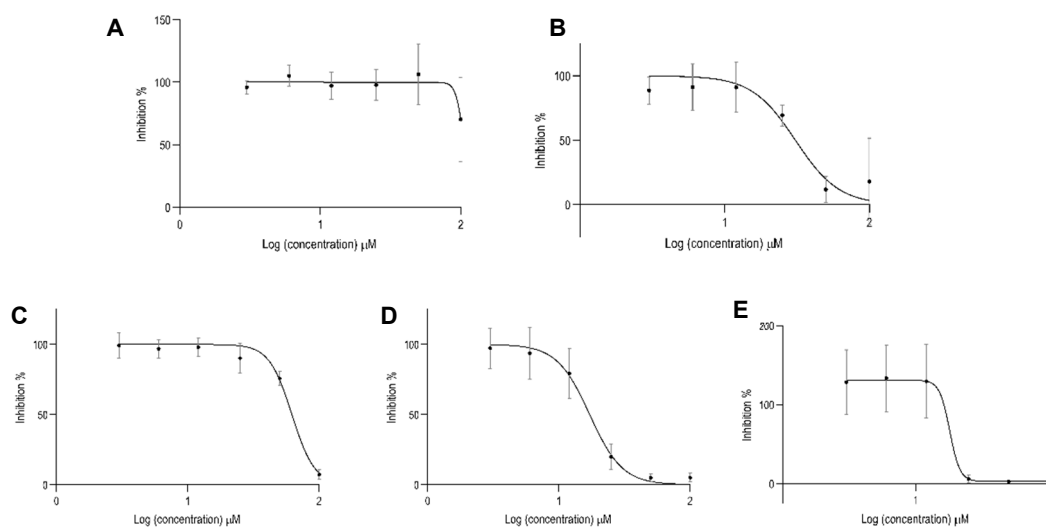

**Figure S6.**  $IC_{50}$  calculations of hydroethanolic extract (HEAB) (A), dichloromethane extract (DCMAB) (B), 1 (C), 2 (D) and 3 (E). Points correspond to mean values  $\pm$  S.D.;  $n = 6$ .

**Table S1.** Optimized MRM parameters for the quantification of active compounds by UHPLC-MS/MS.

| Compound | Precursor Ion | SRM transition | DP (V) | EP (V) | CE (eV) | CXP (V) | Dwell time (ms) |
|----------|---------------|----------------|--------|--------|---------|---------|-----------------|
| 1        | 525           | 525 → 271      | 30     | 10     | 10      | 7       | 125             |
| 2        | 539           | 539 → 285      |        |        |         |         |                 |
| 3        | 509           | 509 → 255      | 80     |        | 50      | 12      |                 |

SRM, Selected reaction monitoring; DP, Declustering potential; EP, Entrance potential; CE, Collision energy; CXP, Collision cell exit.

**Table S2.** Calibration curves parameters for active compounds and determination of the LOD and LOQ in ng/mL.

| Compound | Linear function        | r <sup>2</sup> | LOD (ng/mL) | LOQ (ng/mL) |
|----------|------------------------|----------------|-------------|-------------|
| 1        | $y = 816x + 6,06.10^3$ | 0.998          | 0.21        | 0.64        |
| 2        | $y = 422x + 3,51.10^3$ |                | 0.47        | 1.41        |
| 3        | $y = 122x + 639$       |                | 1.42        | 4.25        |

r<sup>2</sup>, Correlation coefficient; LOD, Limit of Detection; LOQ, limit of quantification.
